# Supplementary material
Source: ML conference proceedings conference paper supplement (https://www.ecva.net/papers/eccv_2024/papers_ECCV/html/3128_ECCV_2024_paper.php)
Supplement: Supplementary file 1 [file 03128-supp.pdf]

# AdaGlimpse: Active Visual Exploration with Arbitrary Glimpse Position and Scale – Supplementary Materials

Adam Pardy<sup>1,2,3</sup>, Michał Wronka<sup>2</sup>, Maciej Wołczyk<sup>1</sup>, Kamil Adamczewski<sup>1</sup>, Tomasz Trzcinski<sup>1,4,5</sup>, and Bartosz Zieliński<sup>1,2</sup>

<sup>1</sup> IDEAS NCBR

{adam.pardyl, maciej.wolczyk, kamil.adamczewski,  
tomasz.trzcinski, bartosz.zielinski}@ideas-ncbr.pl

<sup>2</sup> Jagiellonian University, Faculty of Mathematics and Computer Science  
michal.wronka@student.uj.edu.pl

<sup>3</sup> Jagiellonian University, Doctoral School of Exact and Natural Sciences

<sup>4</sup> Warsaw University of Technology

<sup>5</sup> Tooploox

In this Supplementary Materials, we present additional experiments and visualizations for our AdaGlimpse active visual exploration method.

**Table 1: Heuristic baselines:** We compared our reinforcement learning-based method against two heuristic exploration policies for the reconstruction task on the ImageNet-1k dataset. Both heuristic methods use the same ElasticViT backbone as our approach and utilize  $32^2$  glimpses, consisting of four ViT patches. The first method, called BasicElasticAME, samples one low-resolution glimpse of the entire image, followed by small, high-resolution glimpses selected using the AME algorithm. The second method, called QuadTreeAME, also begins with a single low-resolution glimpse. It then iteratively selects the most uncertain patch using AME, sampling a new glimpse at its position to effectively acquire four new higher-resolution patches in place of the selected lower-resolution patch. For comparison, we also provide results for a standard, fixed-resolution AME baseline. We observed that our method outperforms these heuristic baselines.

| Method          | RMSE        | Image res.       | Glimpses         | Regime               | Pixel % |
|-----------------|-------------|------------------|------------------|----------------------|---------|
| AME             | 30.3        | $128 \times 256$ | $8 \times 32^2$  | simple               | 25.00   |
| BasicElasticAME | 25.95       | $224 \times 224$ | $12 \times 32^2$ | adaptive (heuristic) | 24.49   |
| QuadTreeAME     | 23.2        | $224 \times 224$ | $12 \times 32^2$ | adaptive (heuristic) | 24.49   |
| <b>Ours</b>     | <b>14.5</b> | $224 \times 224$ | $12 \times 32^2$ | adaptive             | 24.49   |

**Table 2: Model and training configuration:** In this table we specify the model and training configuration details.

| Parameter name                 | Value         |
|--------------------------------|---------------|
| Encoder                        |               |
| ViT type                       | <b>base</b>   |
| native patch size              | 16            |
| transformer embed dim          | 768           |
| transformer blocks             | 12            |
| attention heads                | 12            |
| mlp ratio                      | 4             |
| Decoder                        |               |
| transformer embed dim          | 512           |
| transformer blocks             | 8             |
| attention heads                | 16            |
| mlp ratio                      | 4             |
| RL agent                       |               |
| hidden dim                     | 256           |
| action distribution            | TanhNormal    |
| sac target entropy value       | -3            |
| sac initial alpha value        | 1             |
| Training                       |               |
| training epochs                | 100           |
| backbone pre-training epochs   | 600           |
| backbone lr                    | $10^{-5}$     |
| rl agent lr                    | $5 * 10^{-4}$ |
| backbone weight decay rate     | $10^{-4}$     |
| rl agent weight decay rate     | $10^{-2}$     |
| lr scheduler type              | one cycle     |
| lr warmup epochs               | 10            |
| minimum lr                     | $10^{-8}$     |
| initial random action batches  | 10000         |
| initial frozen backbone epochs | 10            |
| rl loss function               | L2            |
| rl batch size                  | 256           |
| backbone batch size            | 128           |
| replay buffer size             | 10000         |

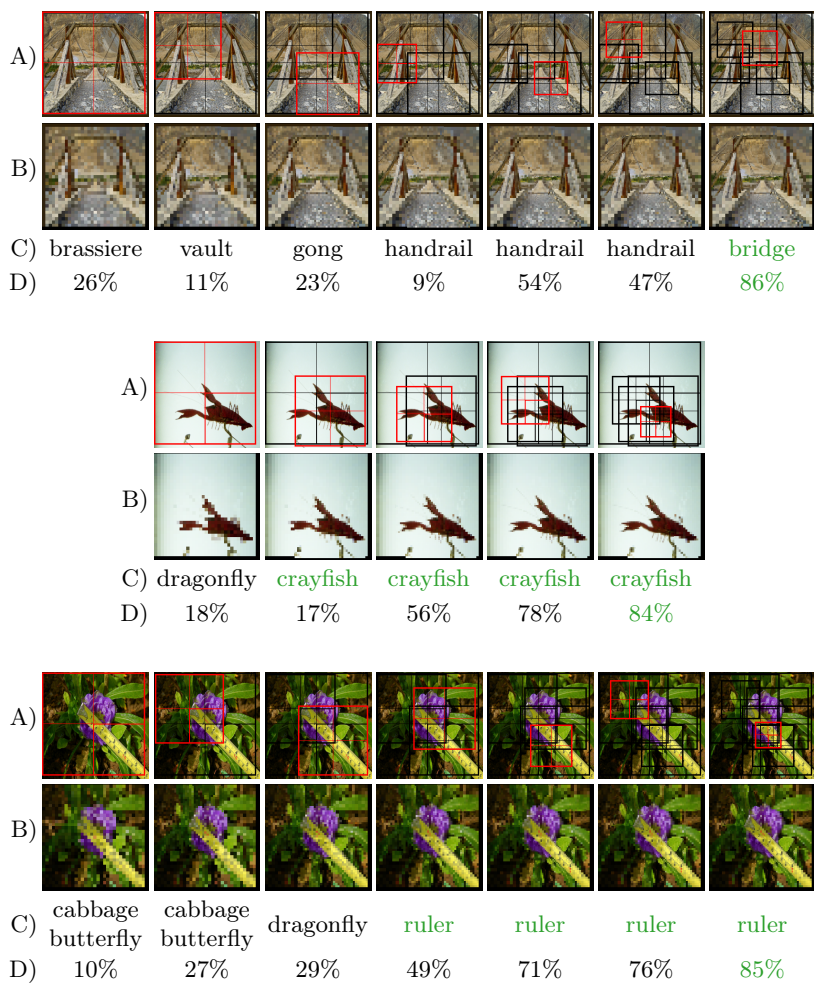

**Fig. 1: Image classification on ImageNet-1k step-by-step:** AdaGlimpse explores  $224 \times 224$  images from ImageNet with  $32 \times 32$  glimpses of variable scale, zooming in on objects of interest and stopping the process after reaching 75% predicted probability. The rows correspond to: A) glimpse locations, B) pixels visible to the model (interpolated from glimpses for preview), C) predicted label, D) prediction probability.

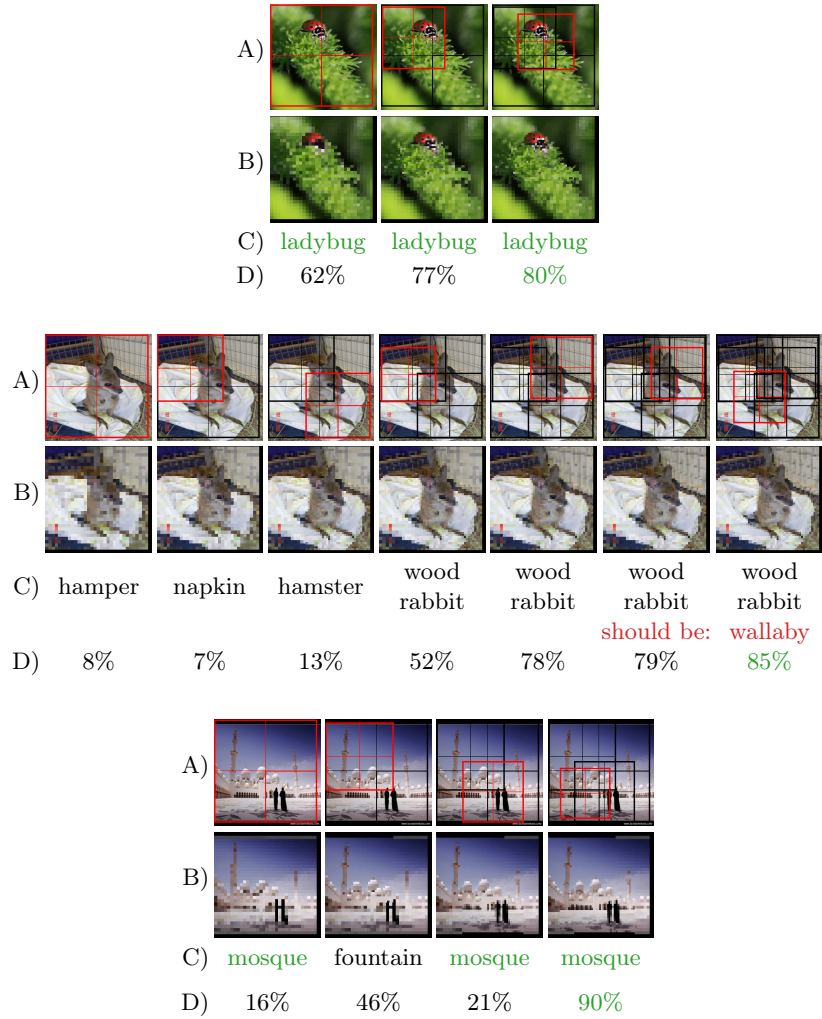

**Fig. 2: Image classification on ImageNet-1k step-by-step:** AdaGlimpse explores  $224 \times 224$  images from ImageNet with  $32 \times 32$  glimpses of variable scale, zooming in on objects of interest and stopping the process after reaching 75% predicted probability. The rows correspond to: A) glimpse locations, B) pixels visible to the model (interpolated from glimpses for preview), C) predicted label, D) prediction probability.

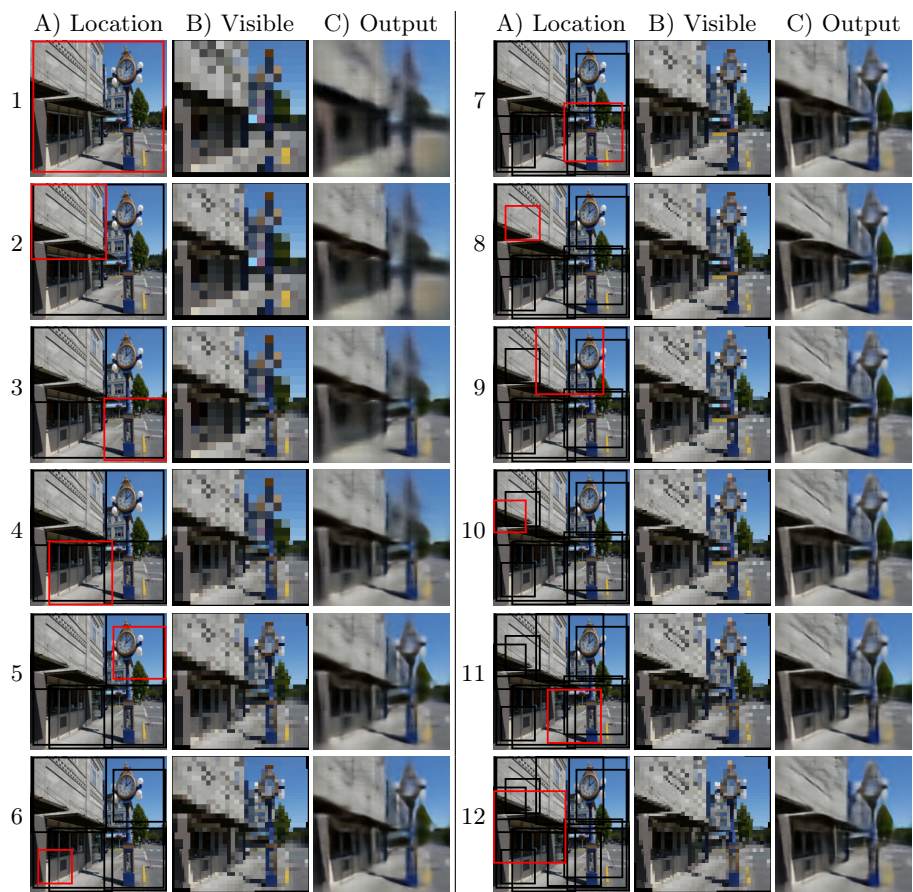

**Fig. 3: Image reconstruction on MS COCO step-by-step:** AdaGlimpse explores  $224 \times 224$  images from MS COCO with  $8 \times 16^2$  glimpses of variable scale, zooming in on objects of interest. Note, that each glimpse consists of a single vision transformer patch. The columns correspond to: A) glimpse locations, B) pixels visible to the model (interpolated from glimpses for preview), C) reconstruction result.

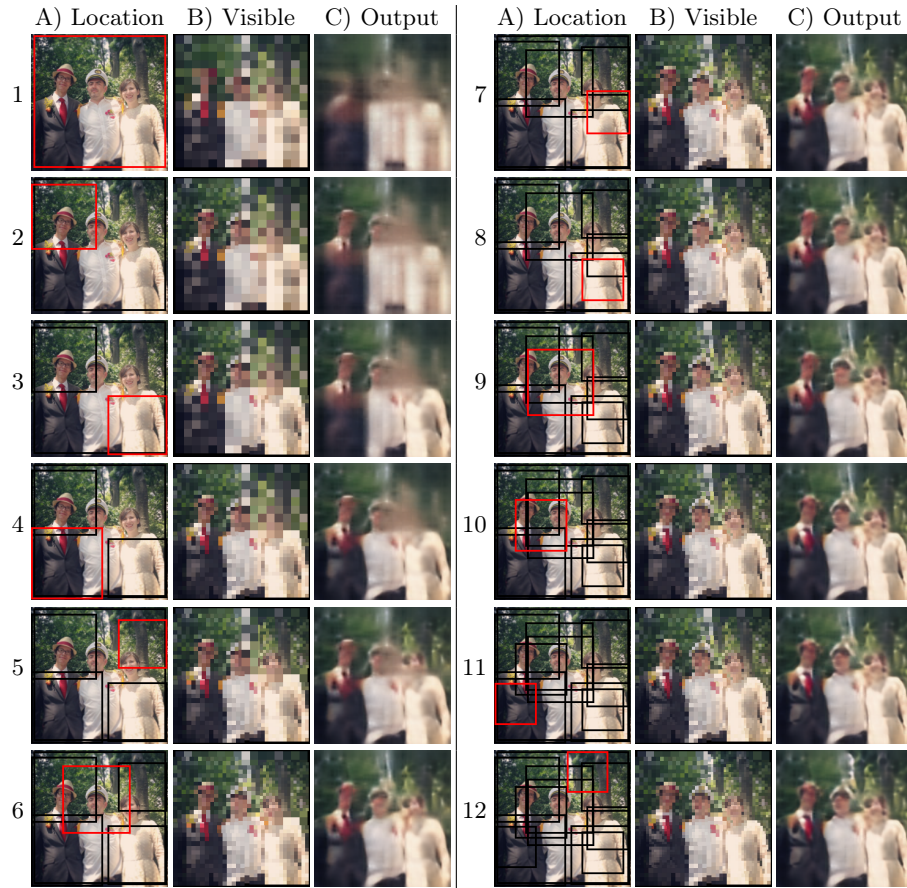

**Fig. 4: Image reconstruction on MS COCO step-by-step:** AdaGlimpse explores  $224 \times 224$  images from MS COCO with  $8 \times 16^2$  glimpses of variable scale, zooming in on objects of interest. Note, that each glimpse consists of a single vision transformer patch. The columns correspond to: A) glimpse locations, B) pixels visible to the model (interpolated from glimpses for preview), C) reconstruction result.

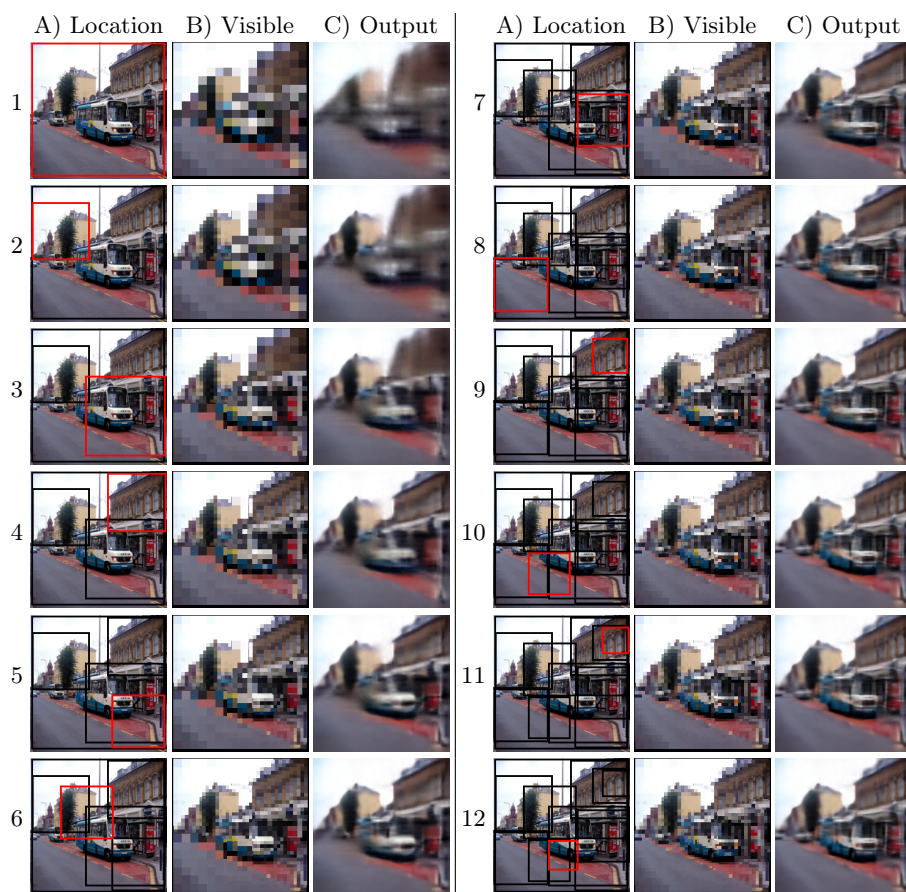

**Fig. 5: Image reconstruction on MS COCO step-by-step:** AdaGlimpse explores  $224 \times 224$  images from MS COCO with  $8 \times 16^2$  glimpses of variable scale, zooming in on objects of interest. Note, that each glimpse consists of a single vision transformer patch. The columns correspond to: A) glimpse locations, B) pixels visible to the model (interpolated from glimpses for preview), C) reconstruction result.

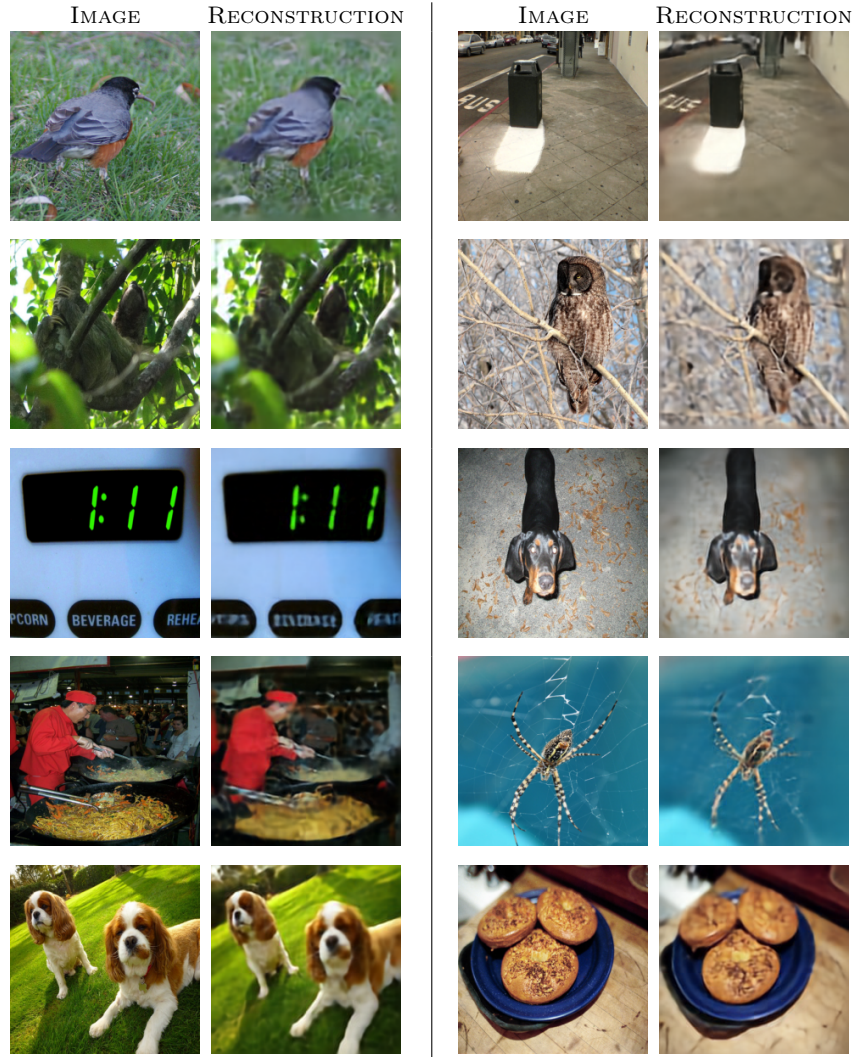

**Fig. 6: Image reconstruction on ImageNet-1k:** Figure shows the qualitative results of the image reconstruction task. Image size is  $224 \times 224$  and  $12 \times 32^2$  adaptive glimpses are used.



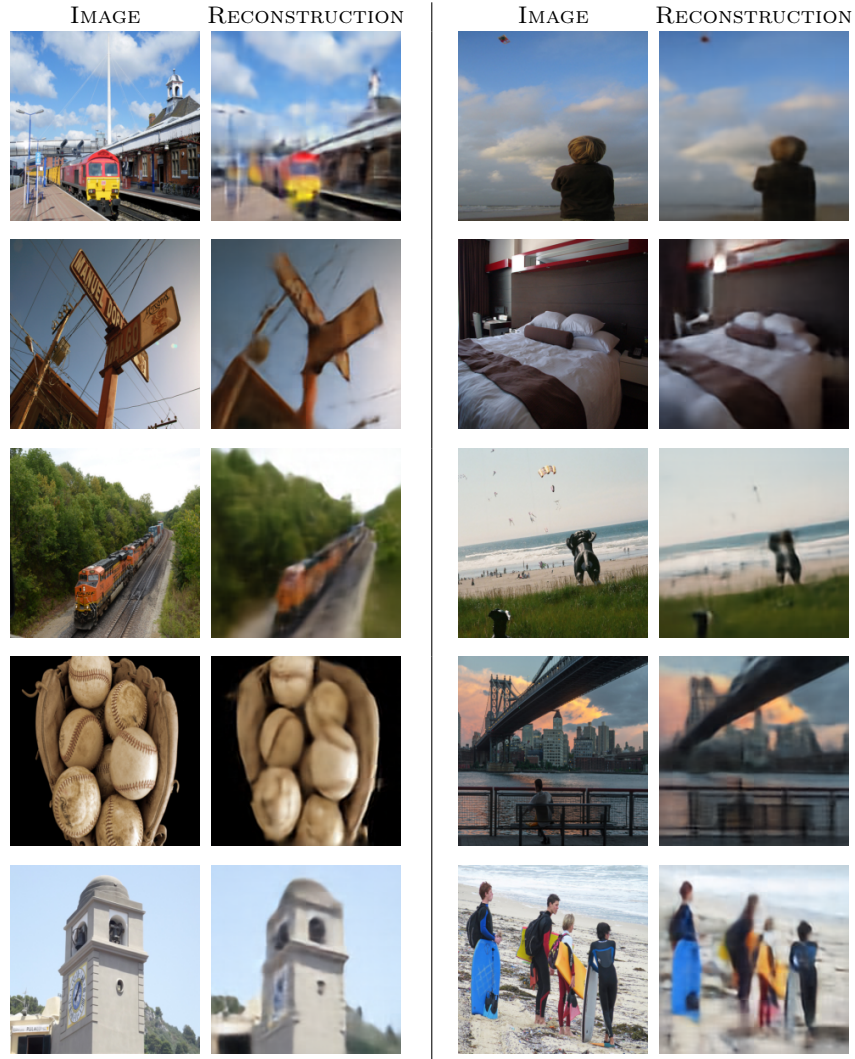

**Fig. 7: Image reconstruction on MS COCO:** Figure shows the qualitative results of the image reconstruction task. Image size is  $224 \times 224$  and  $12 \times 16^2$  adaptive glimpses are used.

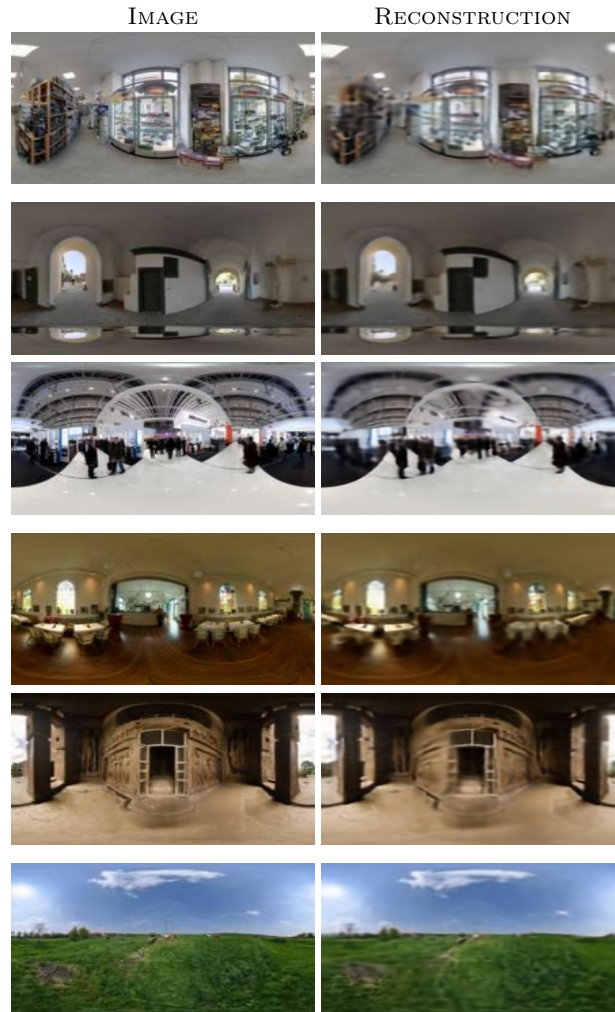

**Fig. 8: Image reconstruction on SUN360:** Figure shows the qualitative results of the image reconstruction task. Image size is  $224 \times 224$  and  $12 \times 32^2$  adaptive glimpses are used. For visualization, images were resized to the original aspect ratio.

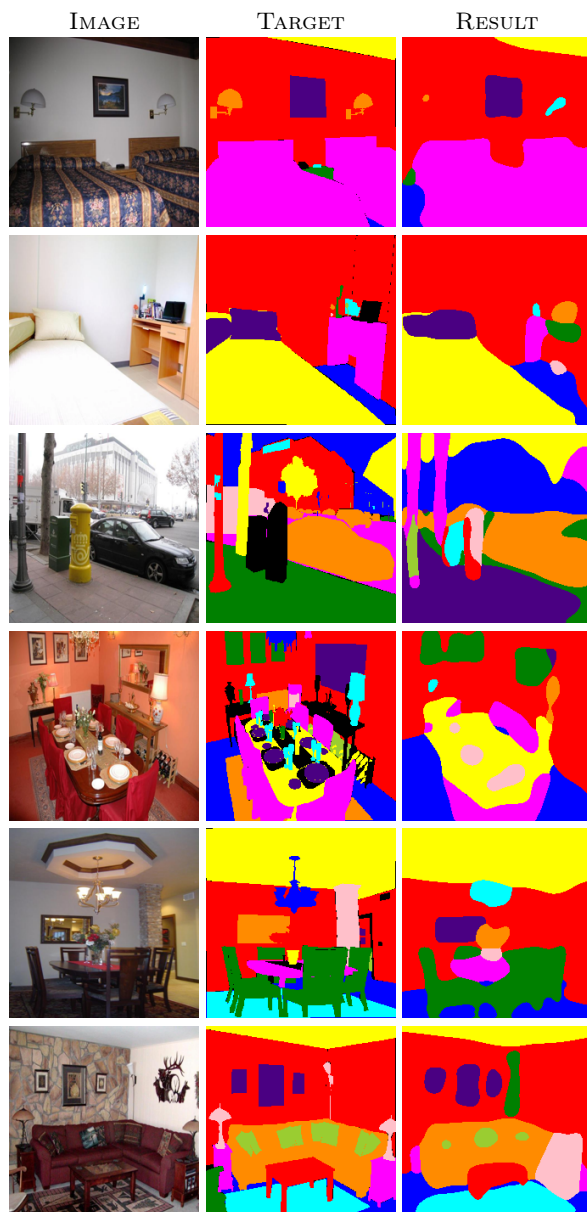

**Fig. 9: Image segmentation on ADE20K:** Figure shows the qualitative results of the image segmentation task. Image size is  $224 \times 224$  and  $12 \times 48^2$  adaptive glimpses are used.
